# Supplementary material for: Deep learning models for predicting the survival of patients with hepatocellular carcinoma based on a surveillance, epidemiology, and end results (SEER) database analysis
Source: PubMed Central journal article supplement (PMC11163004; doi:10.1038/s41598-024-63531-9), 2024-06-09
Supplement: 41598_2024_63531_MOESM1_ESM.pdf [file 41598_2024_63531_MOESM1_ESM.pdf]

# eFigure1 The online web-based application of NMTLR model

Age: ≤ 66

N: N0

Race: Americ...

M: M0

Marital\_status: Other

AFP: Negati...

Histological\_type: 8170

Tumor\_size: ≤ 62 mm

Grade: Well di...

Surgery: Lobect...

T: T1

Chemotherapy: Yes

Please select model 📌  
NMTLR

Predict

## Estimated Survival Probability

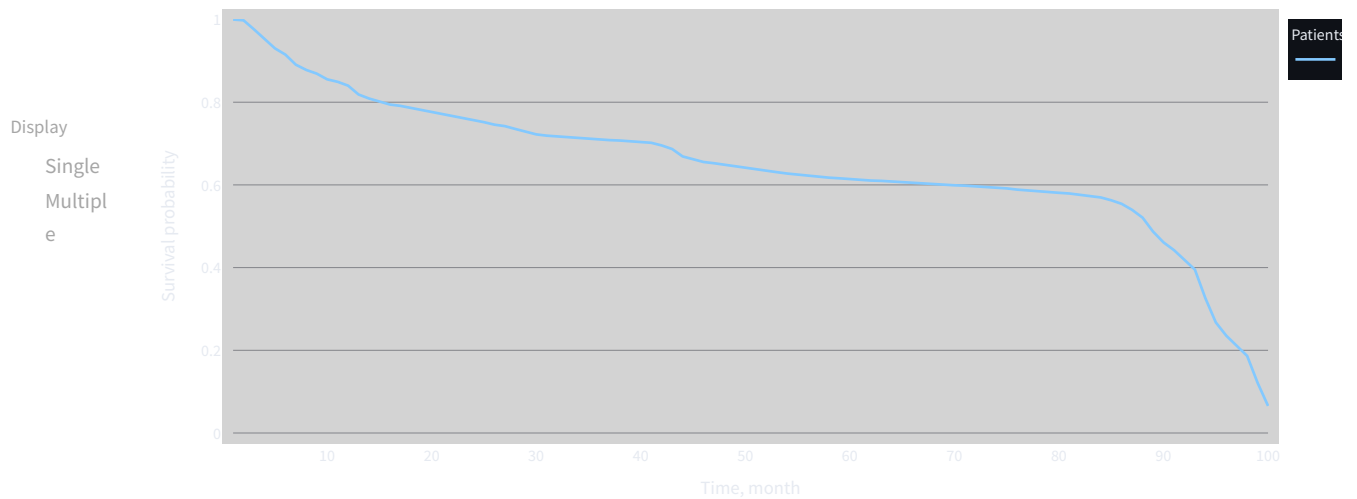

1-Year survival probability

85.53%

3-Year survival probability

73.52%

5-Year survival probability

65.54%

|   | Patients | Model | 1-Year | 3-Year | 5-Year | AFP                                   | Age  | Chemotherapy | Grade                        | Histological_ |
|---|----------|-------|--------|--------|--------|---------------------------------------|------|--------------|------------------------------|---------------|
| 0 | 1        | NMTLR | 85.53% | 73.52% | 65.54% | Negative/normal; within normal limits | ≤ 66 | Yes          | Well differentiated; Grade I | 8170          |
